# Supplementary figures and images for: Cholestasis is associated with a higher rate of complications in both medical and surgical necrotizing enterocolitis.
Source: Research Square preprint supplement (doi:10.21203/rs.3.rs-2833628/v1), 2023-05-09

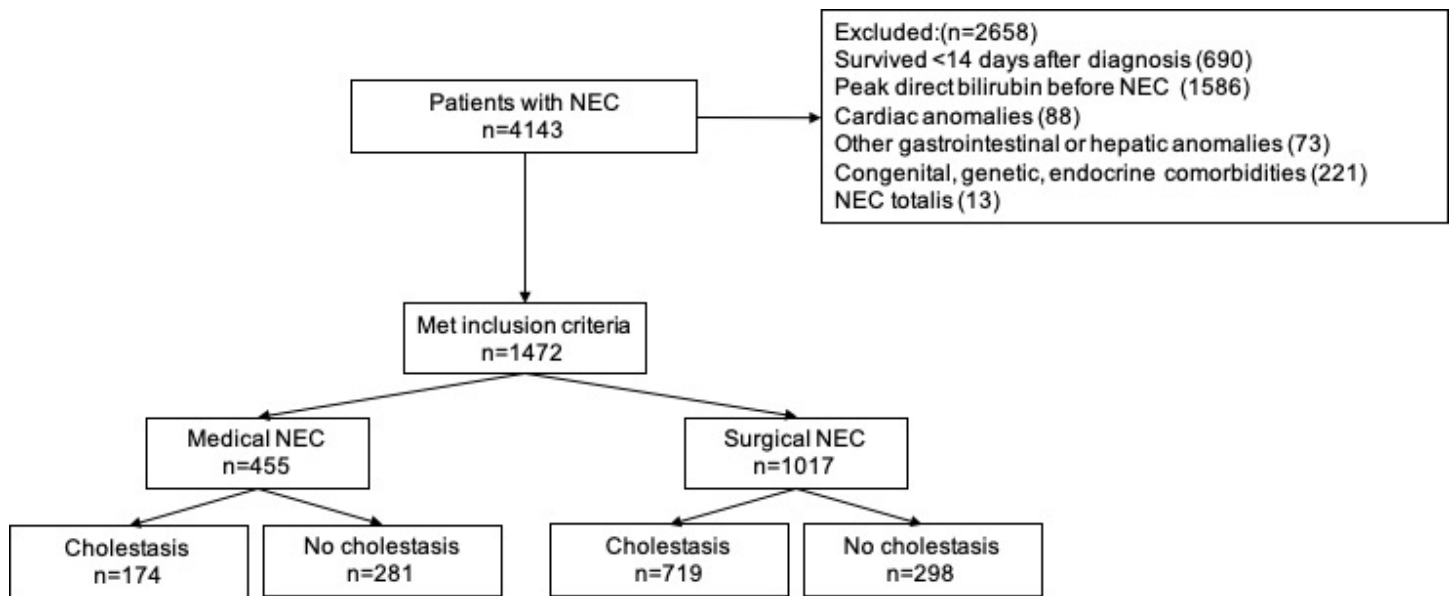

**Supplemental Figure 1:** Flow diagram explaining the inclusion and exclusion of study subjects.

Supplement: Supplementary file 1 [file c7f397898e1b1161cbab7988.pdf]
